# Supplementary material
Source: ML conference proceedings conference paper supplement (https://proceedings.neurips.cc/paper_files/paper/2023/hash/548a41b9cac6f50dccf7e63e9e1b1b9b-Abstract.html)
Supplement: Supplementary file 1 [file 548a41b9cac6f50dccf7e63e9e1b1b9b-Supplemental-Datasets_and_Benchmarks.zip]

Archive with 4 entries (4 files):
- NeurIPS_2023_LAMM_datasheet.pdf
- __MACOSX/._NeurIPS_2023_LAMM_datasheet.pdf
- NeurIPS_2023_LAMM_supp.pdf
- __MACOSX/._NeurIPS_2023_LAMM_supp.pdf
